# Supplementary material for: Iroquois transcription factor irx2a is required for multiciliated and transporter cell fate decisions during zebrafish pronephros development
Source: PubMed Central journal article supplement (PMC6478698; doi:10.1038/s41598-019-42943-y), 2019-04-23

**Iroquois transcription factor *irx2a* is required for multiciliated and transporter cell fate decisions during zebrafish pronephros development**

Amanda N. Marra<sup>1,2</sup>, Christina N. Cheng<sup>1,2</sup>, Basma Adeeb<sup>1</sup>, Amanda Addiego<sup>1</sup>,  
Hannah Wesselman<sup>1</sup>, Brooke E. Chambers<sup>1</sup>, Joseph M. Chambers<sup>1</sup>, and Rebecca A. Wingert<sup>1,\*</sup>

<sup>1</sup>Department of Biological Sciences, Center for Stem Cells and Regenerative Medicine,  
Center for Zebrafish Research, University of Notre Dame, Notre Dame, IN 46556, USA

<sup>2</sup>Equal Contributions

\*Corresponding Author

**Correspondence:** Rebecca A. Wingert, Ph.D., Department of Biological Sciences, University of Notre Dame, 100 Galvin Life Sciences, Notre Dame, IN 46556 USA; Email: rwingert@nd.edu; Phone: (574)-631-0907; Fax: (574)-631-7413

## SUPPLEMENTAL FIGURE LEGENDS

**Supplemental Figure 1: Validation of the *irx2a* splice blocking morpholino reagent.** (A) The *IrxA* cluster is composed of *irx1a*, *irx2a*, and *irx4a* in zebrafish. The *irx2a* morpholino (MO) targets the splice acceptor site located at the 5' end of exon 2. F1 and R1 indicate the relative positions of the RT-PCR forward and reverse primers, respectively. Expected lengths of the wild-type and morphant RT-PCR bands are indicated in number of basepairs. (B) Aberrant splicing is confirmed in *irx2a* morphants generated by the *irx2a* splice MO. RT-PCR products are shown for the wild-type control and *irx2a* morphants. The green box indicates the wild-type bands, and the red asterisk indicates the morphant band. (C) Sequencing results of the wild-type and morphant bands present in *irx2a* morphants are displayed where the morphant band includes the intronic region between exon 1 and 2. (D) Predicted sequences of the wild-type and morphant Irx2a peptide. For the wild-type, alternating black and blue text color indicate sequence encoded by exon 1, 2, 3, and 4 in the open reading frame. By comparison, the morphant Irx2a peptide consists a normal peptide sequence based on exon 1 (black text underlined), followed by 16 aberrant amino acids (blue with yellow highlighting) followed by a premature stop. MO - morpholino, WT - wild-type, bp – basepairs.

## **Supplemental Figure 2: Nephron segmentation patterning is altered in *irx2a* morphants.**

(A) *irx2a* morphants are characterized by an expanded PST (*trpm7*), a shifted DE (*slc12a1*), and a reduced DL (*slc12a3*) by WISH. The PCT (*slc20a1a*) domain remains unchanged. The black bar illustrates the segment domain in relation to the somite number denoted above. Scale bar is 50 ( $\mu$ m). (B) Quantification of *slc20a1a* and (C) *trpm7* length. Each dot represents one nephron and data is presented +/-SEM. Significance was determined with an unpaired student's T-test. MO – morpholino.

## **Supplemental Figure 3: Standard control morpholino does not affect nephron segment or**

**MCC development.** (A) WISH was performed at the 28 somite stage for the PCT (*slc20a1a*), PST (*trpm7*), DE (*slc12a1*), DL (*slc12a3*) and MCC (*odf3b*) in uninjected controls and standard control morpholino injected wild-type zebrafish. Quantification of absolute segment length (B) and MCC number (C) revealed that there was no difference between these groups. Scale bar is 50 ( $\mu$ m). Each dot represents one nephron in a different embryo and data is presented +/-SEM. Significance was determined with an unpaired student's T-test. MO – morpholino.

**Supplemental Figure 4: MCC loss in *irx2a* morphants continues at 36 hpf.** (A) Dorsal view of the pronephros at 36 hpf where MCCs are labeled with *odf3b* in purple. Scale bar is 50  $\mu\text{m}$ . (B) Quantification of *odf3b*<sup>+</sup> cells at 36 hpf. Each dot represents one pronephros and data is presented +/-SEM. Statistical significance was determined via an unpaired student's T-test. MCC – multiciliated cell, hpf – hours post fertilization.

Supplemental Figure 1

A

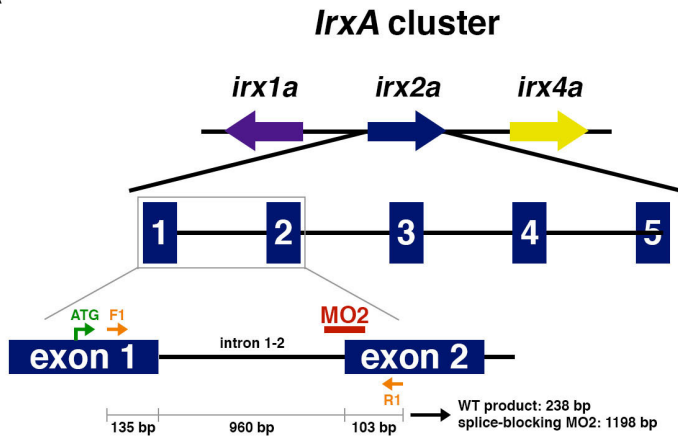

B

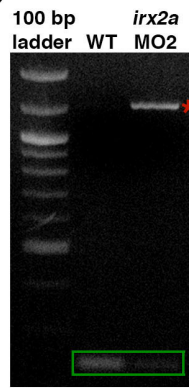

C

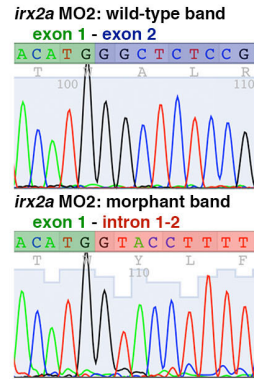

D

**WT *Irx2a* predicted protein**

MSYPQGYLYQPPGSLALYSCPLAAPRSEDLARSSSGSAFSPYPGSAFTAASANGFSSPLPYSTDPAT  
 GFPSYMGSPYDAHTTGMAGAIYHPYGSPPYQLNDPAYRKNATRDATATLKAWLQEHRKNPYPT  
 KGEKIMLAIITKMTLTQVSTWFANARRRLKENKMTWAPRNKSEDEDEDGGERKDERTDKNMDN  
 SEASAEDEGISLHVDALTDHSCSVESDGEKVTTCRTGDLVCDSGAEIQDKCEATDLGEERQRGASPKP  
 VTSSPLTGVEAPLLTHHHRENSTNKTCLDGQNQTVKPKLWSLAEIATSDPKQNCPPGVLLTSSAP  
 GASPAGAVYPATSILGRPLYTSPFYSNYTNYGNFSPLQGGILRYNSAAEGLLHKQTGEPLIKTNP  
 QTEAHFRASNAESKKDPSEVFTVRSQSYLSS **Stop**

**MO2 *Irx2a* predicted protein**

MSYPQGYLYQPPGSLALYSCPLAAPRSEDLARSSSGSAFSPYPGSAFTAASANGFSSPLPYSTDPAT  
 GFPSYMPFQSRSLRIVLDRNAS **Stop**

# Supplemental Figure 2

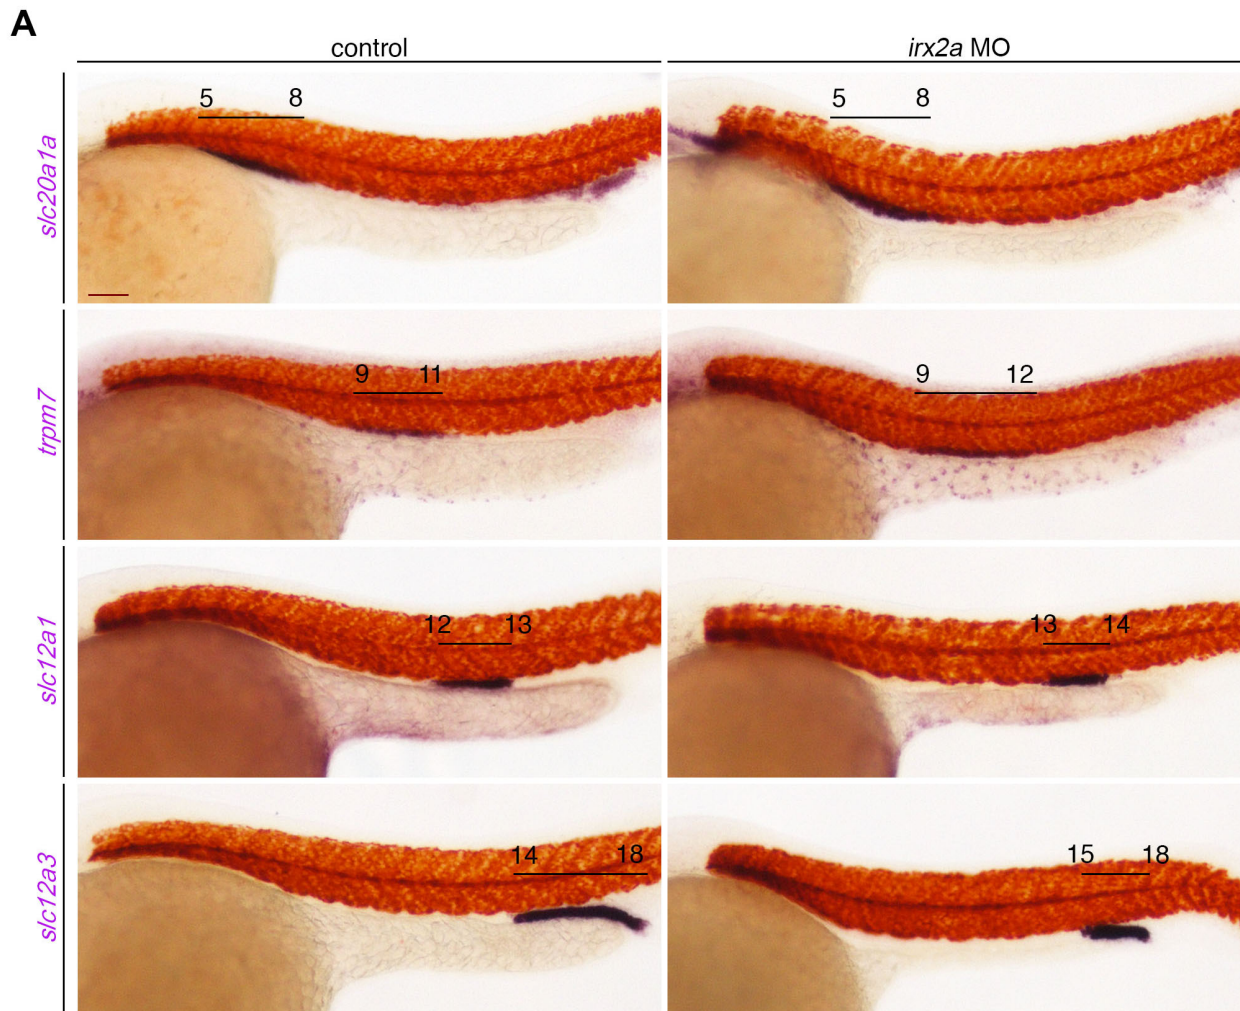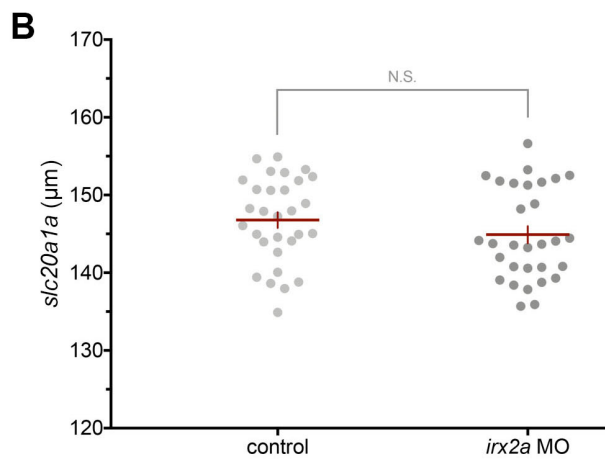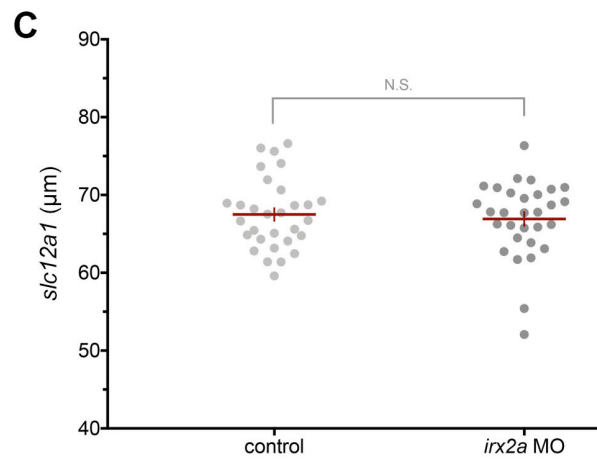

Supplemental Figure 3

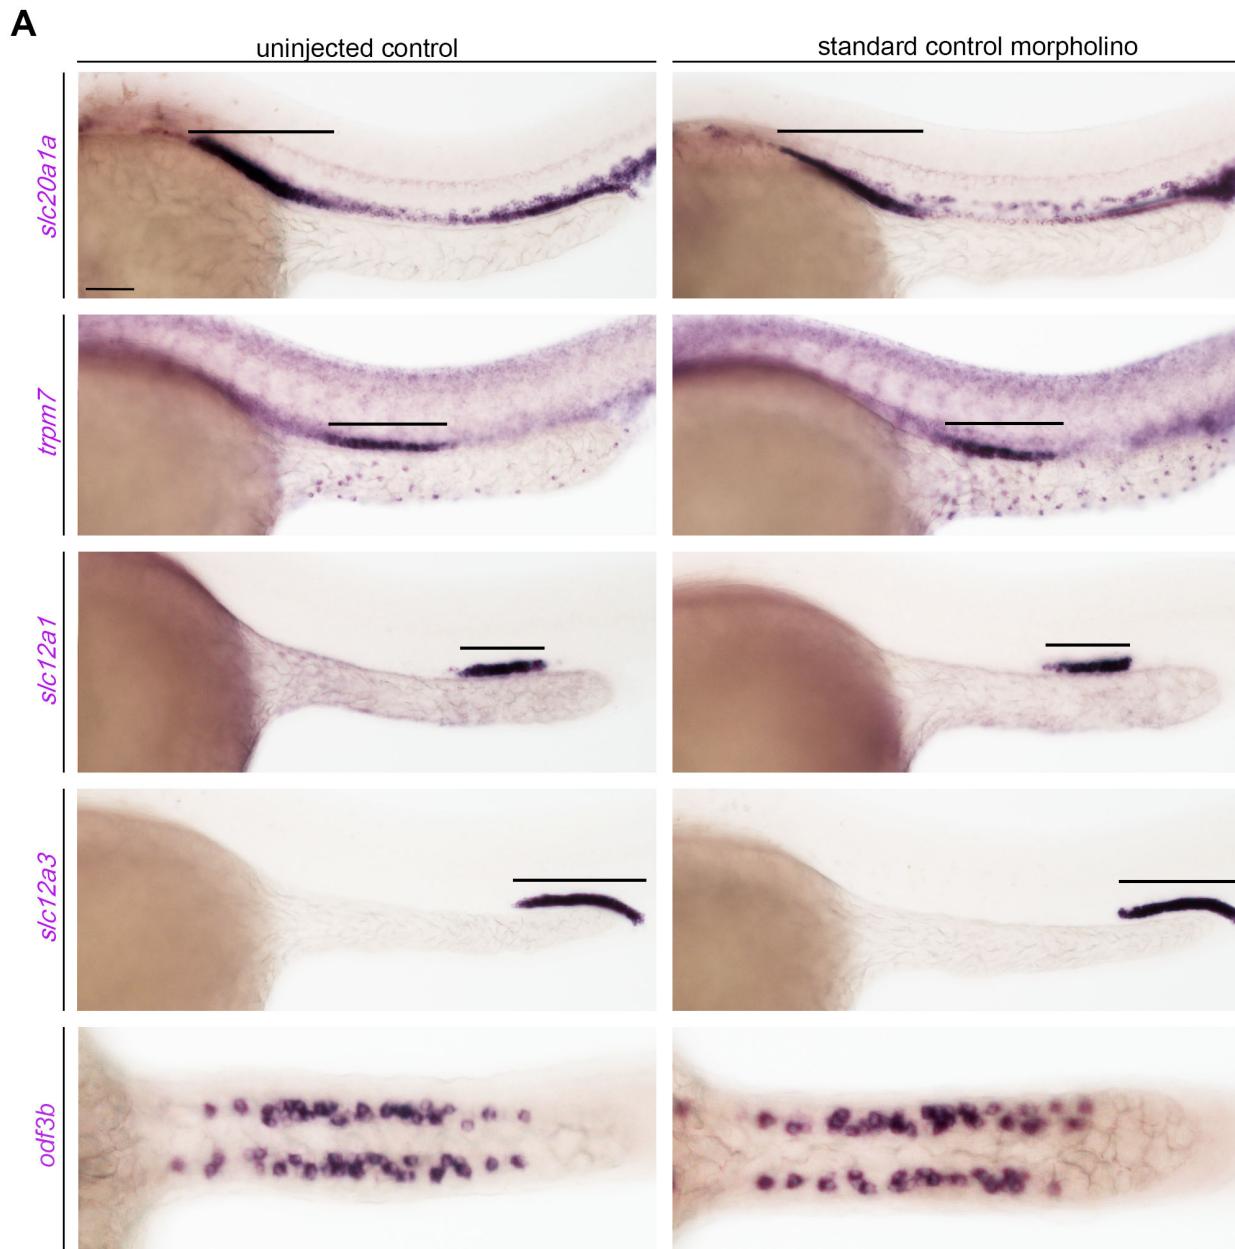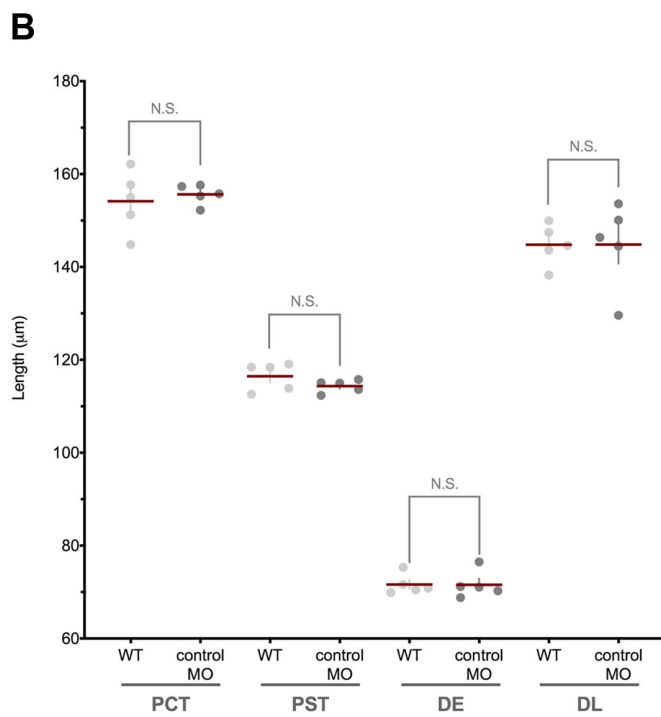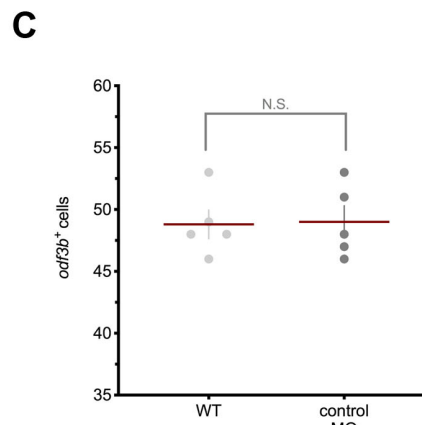

# Supplemental Figure 4

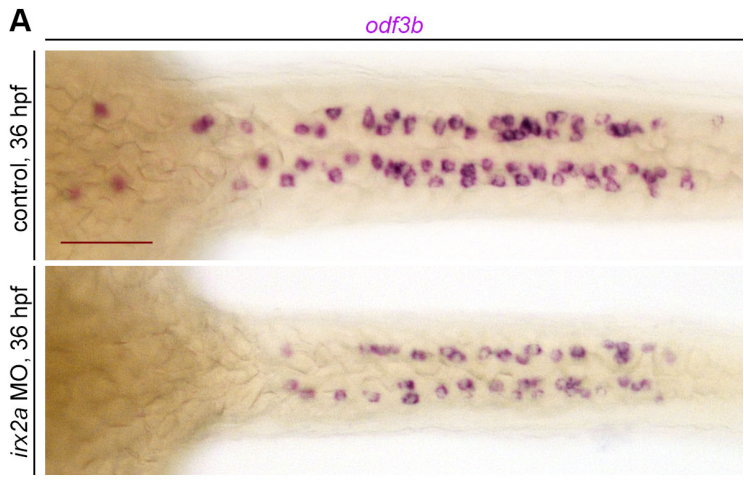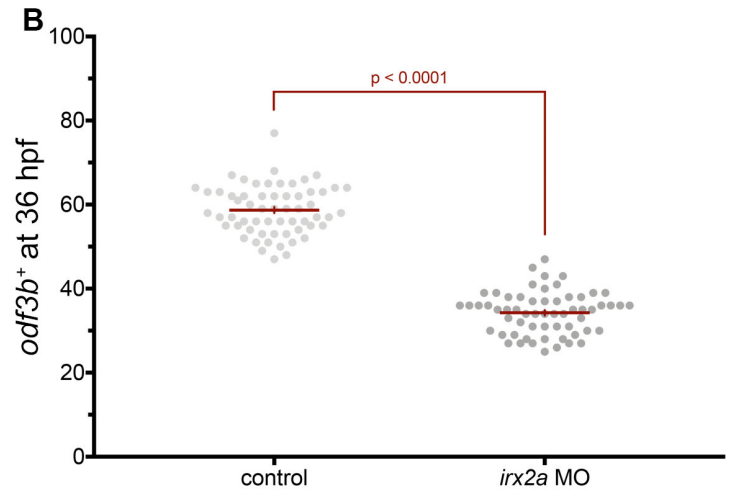

Supplement: 41598_2019_42943_MOESM1_ESM.pdf [file 41598_2019_42943_MOESM1_ESM.pdf]
